# Supplementary material for: Photocatalytic and Antibacterial Activities of a Nickel(II)-Bipyridine Complex-Modified Graphene Oxide Nanocomposite: Synthesis and Characterization
Source: MDPI journal article supplement (doi:10.3390/catal13081200), 2023-08-10
Supplement: s1 [file s1]

# Photocatalytic and Antibacterial Activities of a Nickel(II)-Bipyridine Complex-Modified Graphene Oxide Nanocomposite: Synthesis and Characterization

Ganeshraja Ayyakannu Sundaram <sup>1,2,\*</sup>, Prasanth Ravikumar <sup>2</sup>, Lavanya Ramesh <sup>1</sup>, Hema Kesavan <sup>1</sup>, Siva Padma Devi Sadhasivam <sup>3</sup>, Santhana Krishna Kumar Alagarsamy <sup>4,5</sup> and Junhu Wang <sup>6,\*</sup>

<sup>1</sup> Department of Chemistry, SRM Institute of Science and Technology, Ramapuram Campus, Chennai 600 089, Tamil Nadu, India; lavanyar2@srmist.edu.in (L.R.); hemak@srmist.edu.in (H.K.)

<sup>2</sup> Department of Chemistry, National College, Tiruchirapalli 620 001, Tamil Nadu, India; prasanthravi444808@gmail.com

<sup>3</sup> Department of Geography, M.V. Muthiah Government Arts College for Women, Affiliated to Mother Teresa Women's University, Dindigul 624 001, Tamil Nadu, India; santhapadma@gmail.com

<sup>4</sup> Department of Chemistry, National Sun Yat-sen University, No. 70, Lien-hai Road, Gushan District, Kaohsiung 80424, Taiwan; santhanakumarbits@gmail.com

<sup>5</sup> Faculty of Geology, Geophysics and Environmental Protection, AGH University of Science and Technology, Al. Mickiewicza 30, 30-059, Krakow, Poland; santhanakumarbits@gmail.com

<sup>6</sup> Mössbauer Effect Data Center, Center for Advanced Mössbauer Spectroscopy, Dalian Institute of Chemical Physics, Chinese Academy of Sciences, Dalian 116023, China

\* Correspondence: ganeshra@srmist.edu.in and asgchem84@gmail.com (G.A.S.); wangjh@dicp.ac.cn (J.W.)

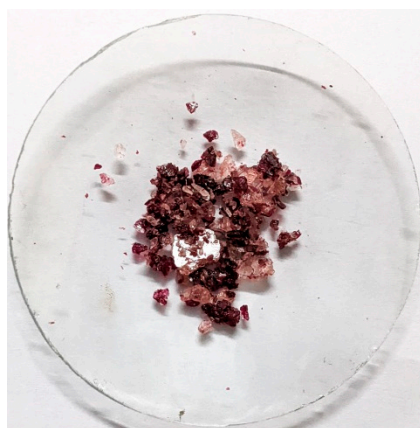

Figure S1. Image of prepared precursor complex.

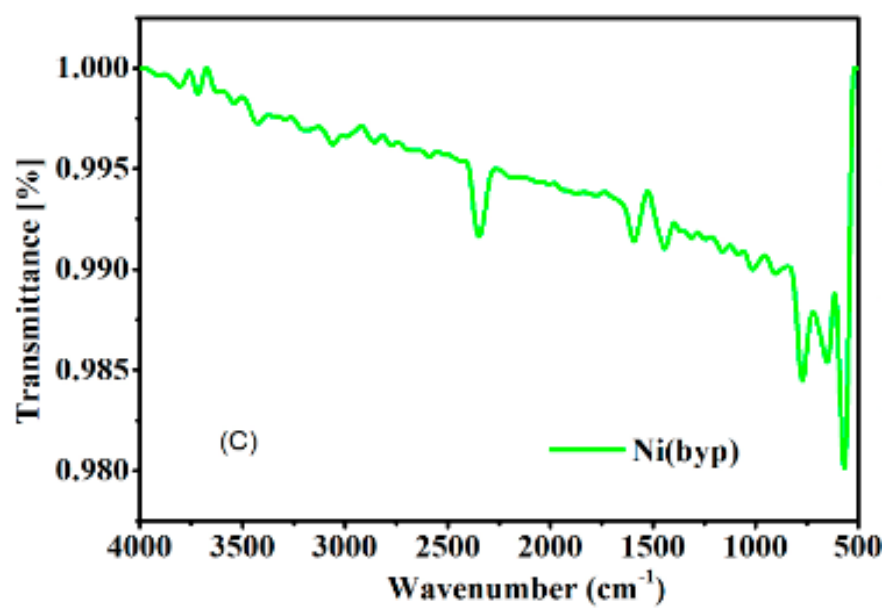

Figure S2. Image of FTIR Spectrum of prepared precursor complex.

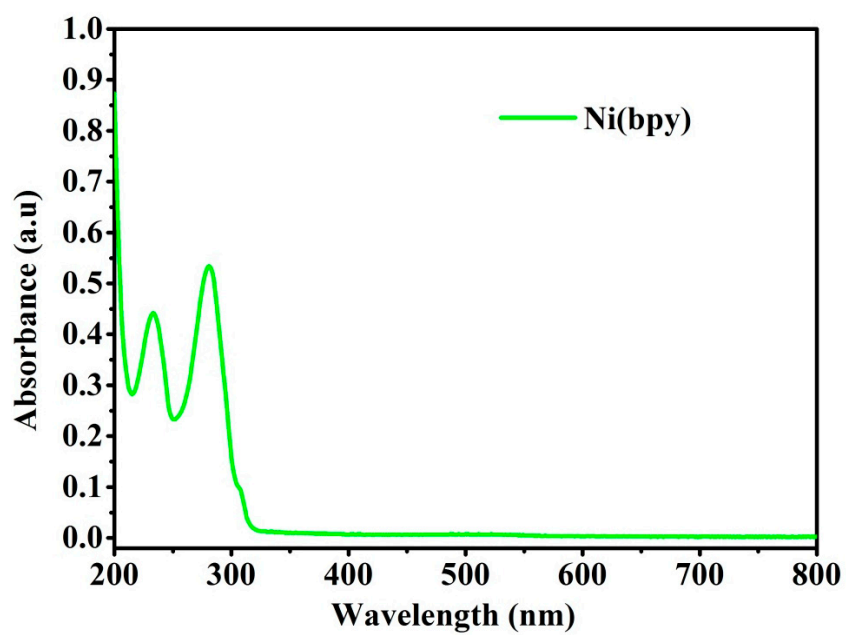

**Figure S3.** Image of UV-vis Spectrum of prepared precursor complex.

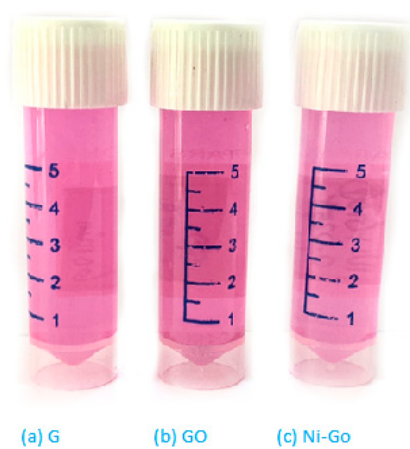

**Figure S4.** Image of RhB solution after adsorption process with prepared catalysts at room temperature.

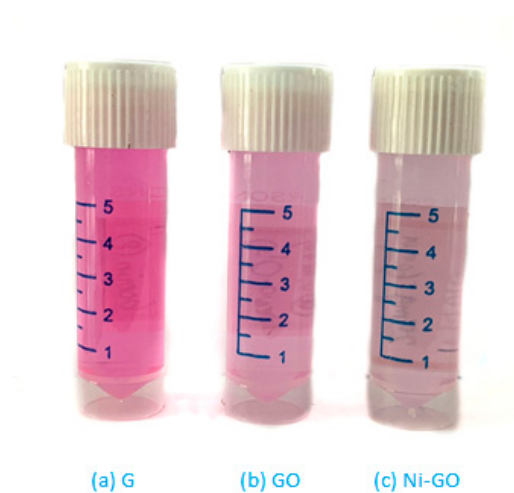

**Figure S5.** Image of RhB solution after photocatalysis process with prepared photocatalysts at room temperature.

**Table S1.** XRD data of Graphite.

| Pos. [ $^{\circ}2\theta$ ] | Height [cts] | FWHM Left [ $^{\circ}2\theta$ ] | d-spacing [ $\text{\AA}$ ] | Rel. Int. [%] |
|----------------------------|--------------|---------------------------------|----------------------------|---------------|
| 26.4423                    | 74985.42     | 0.2890                          | 3.36802                    | 100.00        |
| 42.3152                    | 744.99       | 0.1560                          | 2.13418                    | 0.99          |
| 44.4163                    | 666.72       | 0.9368                          | 2.03798                    | 0.89          |
| 54.5106                    | 1956.28      | 0.3505                          | 1.68204                    | 2.61          |
| 77.4597                    | 608.52       | 0.1874                          | 1.23120                    | 0.81          |

**Table S2.** XRD data of Graphene Oxide.

| Pos. [ $^{\circ}2\theta$ ] | Height [cts] | FWHM Left [ $^{\circ}2\theta$ ] | d-spacing [ $\text{\AA}$ ] | Rel. Int. [%] |
|----------------------------|--------------|---------------------------------|----------------------------|---------------|
| 26.4549                    | 45375.57     | 0.3174                          | 3.36644                    | 100.00        |
| 42.3247                    | 374.33       | 0.1828                          | 2.13372                    | 0.82          |
| 44.3635                    | 374.28       | 0.6891                          | 2.04028                    | 0.82          |
| 54.5084                    | 1275.41      | 0.3062                          | 1.68210                    | 2.81          |
| 77.4609                    | 355.47       | 0.1809                          | 1.23118                    | 0.78          |

**Table S3.** XRD data of Ni-GO nanocomposite.

| Pos. [ $^{\circ}2\theta$ ] | Height [cts] | FWHM Left [ $^{\circ}2\theta$ ] | d-spacing [ $\text{\AA}$ ] | Rel. Int. [%] |
|----------------------------|--------------|---------------------------------|----------------------------|---------------|
| 10.9548                    | 3579.74      | 0.6576                          | 8.06994                    | 100.00        |
| 26.3420                    | 69.43        | 0.5481                          | 3.38060                    | 1.94          |
| 42.3785                    | 291.98       | 0.6702                          | 2.13114                    | 8.16          |

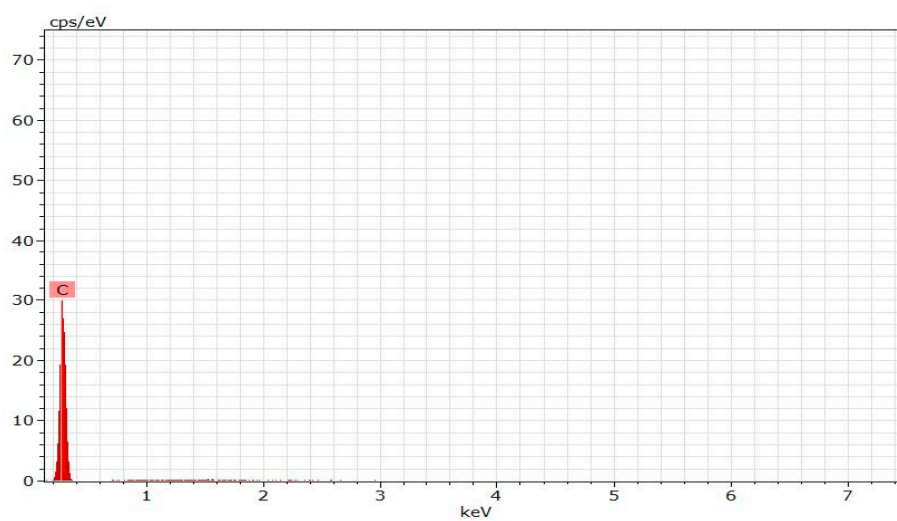

**Figure S6.** EDAX spectrum of Graphite.

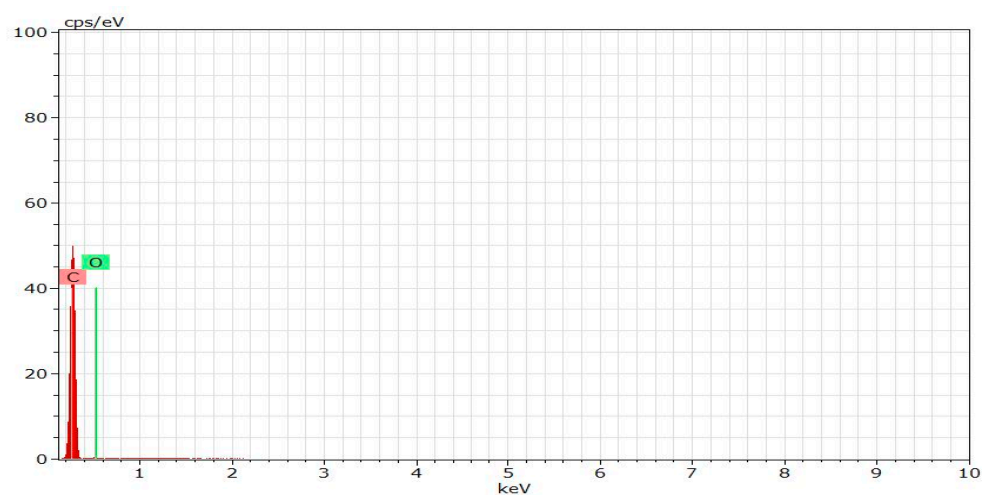

**Figure S7.** EDAX spectrum of GO.

**Table S4.** EDAX data of G, GO and Ni/GO composite.

| S.No. | Sample | Elements | At. No. | Series | Wt. (%) | At (%) | Sigma Wt. (%) |
|-------|--------|----------|---------|--------|---------|--------|---------------|
| 1     | G      | C        | 6       | K      | 100     | 100    | 14.75         |
| 2     | GO     | C        | 6       | K      | 99.16   | 99.37  | 12.35         |
|       |        | O        | 8       | K      | 0.84    | 0.63   | 0.42          |
| 3     | Ni-GO  | C        | 6       | K      | 70.82   | 76.49  | 10.21         |
|       |        | O        | 8       | K      | 28.92   | 23.45  | 5.42          |
|       |        | Ni       | 28      | L      | 0.26    | 0.06   | 0.29          |

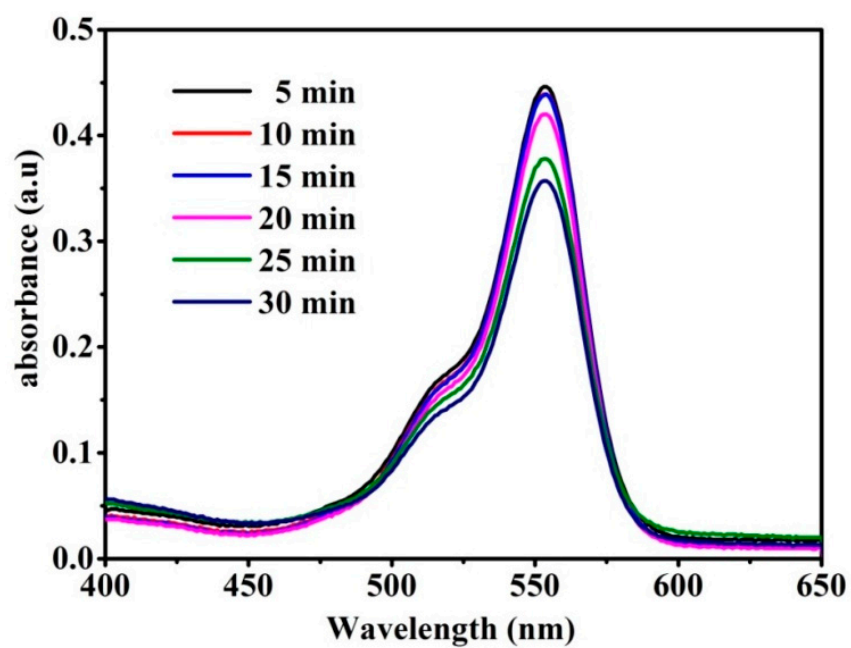

**Figure S8.** UV-visible spectra of photo irradiated solution of RhB with Ni-GO composite at various time intervals under sunlight irradiation in water.

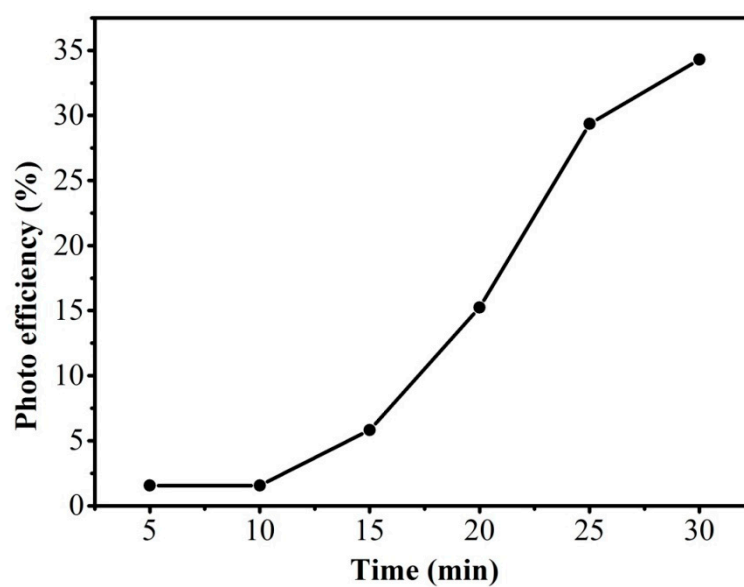

**Figure S9.** PE of Ni-GO composite at various irradiation times under sunlight.
